# Supplementary material
Source: PubMed Central journal article supplement (PMC4790839)
Supplement: kena009790.ww3_default.pdf [file kena009790.ww3_default.pdf]

## Results of service utilisation

*Available case\* resource use*

| <b>Resource Use</b>           | <b>Mean</b> |                | <b>Difference in mean (95% CI)</b> |
|-------------------------------|-------------|----------------|------------------------------------|
|                               | <b>WISE</b> | <b>Control</b> |                                    |
| <b>Length of stay</b>         | 1.589       | 1.322          | 0.268<br>(-0.343 to 0.879)         |
| <b>Outpatient attendances</b> | 2.912       | 2.887          | 0.024<br>(-0.366 to 0.415)         |
| <b>A&amp;E attendances</b>    | .298        | .290           | 0.009<br>(-0.050 to 0.068)         |
| <b>GP surgery visits</b>      | 4.429       | 4.505          | -0.077<br>(-0.371 to 0.218)        |
| <b>GP home visits</b>         | 0.155       | 0.227          | -0.072<br>(-0.009 to -0.135)       |
| <b>GP Other</b>               | 0.208       | 0.280          | -0.072<br>(-0.157 to 0.012)        |
| <b>Practice Nurse visits</b>  | 2.783       | 2.893          | -0.110<br>(-0.307 to 0.086)        |
| <b>Community Nurse visits</b> | 1.141       | 0.615          | 0.525<br>(0.129 to 0.922)          |
| <b>OT Visits</b>              | 0.136       | 0.081          | 0.055<br>(-0.057 to 0.166)         |
| <b>Home care worker</b>       | 1.156       | 2.290          | -1.133<br>(-4.405 to 2.139)        |
| <b>Meals on wheels</b>        | 0.028       | 0.181          | -0.153<br>(-0.402 to 0.095)        |
| <b>Physiotherapist</b>        | 0.104       | 0.090          | 0.014<br>(-0.041 to 0.070)         |
| <b>NHS Direct</b>             | 0.172       | 0.136          | 0.036<br>(-0.030 to 0.101)         |
| <b>Walk in Centre</b>         | 0.534       | 0.357          | 0.178<br>(0.034 to 0.321)          |
| <b>Respite care</b>           | 0.077       | 0.039          | 0.038<br>(-0.031 to 0.107)         |
| <b>Counsellor</b>             | 0.252       | 0.281          | -0.029<br>(-0.156 to 0.098)        |
| <b>Other</b>                  | 0.865       | 0.528          | 0.337<br>(0.045 to 0.630)          |

\*Available cases are those that provided data for that variable at each follow-up, for example if GP visits at 6 months and 12 months were both recorded, then total GP visits over duration of trial has been calculated for that individual. Missing data were about 32%. These were very similar to other variables. At 6 months there were 4470 response (79.8%) to GP question, at 12 months figures were 4075 (72.8%)
